# Supplementary material for: Variation of Cancer Incidence between and within GRELL Countries
Source: MDPI journal article supplement (doi:10.3390/ijerph18179262), 2021-09-02
Supplement: s1 [file s1]

**Table S1.** Average annual person years by registry (years of registration)

| <b>Geographic entity</b>          | <b>Male</b>    | <b>Female</b>  | <b>Male and Female</b> |
|-----------------------------------|----------------|----------------|------------------------|
| <b>Argentina</b>                  | <b>2624956</b> | <b>2741413</b> | <b>5366369</b>         |
| Chaco (2008-2012)                 | 534952         | 536277         | 1071229                |
| Córdoba (2008-2012)               | 656892         | 713428         | 1370320                |
| Entre Rios Province (2008-2011)   | 520039         | 540961         | 1061000                |
| Mendoza (2008-2012)               | 845838         | 886322         | 1732160                |
| Tierra del Fuego (2008-2012)      | 67235          | 64426          | 131661                 |
| <b>Belgium</b>                    | 5317843        | 5531570        | 10849413               |
| <b>Brazil</b>                     | <b>2077949</b> | <b>2280894</b> | <b>4358842</b>         |
| Aracaju (2008-2012)               | 262157         | 301690         | 563847                 |
| Goiânia (2008-2012)               | 618519         | 681738         | 1300257                |
| Curitiba (2008-2011)              | 859395         | 939543         | 1798938                |
| Jau (2008-2012)                   | 65460          | 67829          | 133289                 |
| Pocos de Caldas (2008-2011)       | 73922          | 78006          | 151928                 |
| Florianopolis (2008-2010) **      | 198496         | 212087         | 410583                 |
| <b>Chile</b>                      | <b>1168684</b> | <b>1170606</b> | <b>2339290</b>         |
| Bío Bío Province (2008-2012)      | 191695         | 192464         | 384159                 |
| Concepcion (2008-2010)            | 491178         | 517176         | 1008354                |
| Region of Antofagasta (2008-2010) | 296507         | 270864         | 567371                 |
| Valdivia (2008-2012)              | 189304         | 190103         | 379407                 |
| <b>Colombia</b>                   | <b>1972039</b> | <b>2148206</b> | <b>4120245</b>         |
| Cali (2008-2012) **               | 1073515        | 1171180        | 2244695                |
| Bucaramanga (2008-2012)           | 515950         | 559487         | 1075437                |
| Manizales (2008-2012)             | 184764         | 203682         | 388446                 |
| Pasto (2008-2012)                 | 197810         | 213857         | 411667                 |
| <b>Costa Rica</b>                 | 2300043        | 2234845        | 4534888                |
| <b>Ecuador</b>                    | <b>2986482</b> | <b>3103292</b> | <b>6089774</b>         |
| Quito (2008-2012)                 | 784486         | 836775         | 1621261                |
| Cuenca (2008-2012)                | 239497         | 266088         | 505585                 |
| Guayaquil (2008-2012)             | 1162325        | 1208654        | 2370979                |
| Loja (2008-2010)                  | 98880          | 105583         | 204463                 |
| Manabi (2008-2012)                | 701294         | 686192         | 1387486                |
| <b>France</b>                     | <b>5874440</b> | <b>6253058</b> | <b>12127497</b>        |

|                                   |         |         |         |
|-----------------------------------|---------|---------|---------|
| Bas-Rhin (2008-2011)              | 538538  | 566247  | 1104785 |
| Calvados (2008-2012)              | 330000  | 356737  | 686738  |
| Doubs (2008-2012)                 | 260538  | 269010  | 529547  |
| Gironde (2008-2012)               | 698333  | 758225  | 1456558 |
| Haut-Rhin (2008-2012)             | 369596  | 382833  | 752429  |
| Hérault (2008-2012)               | 498892  | 548010  | 1046902 |
| Isère (2008-2012)                 | 600719  | 619349  | 1220068 |
| Lille-Métropole (2008-2012)       | 382610  | 417332  | 799942  |
| Limousin (2009-2012)              | 181384  | 197175  | 378559  |
| Loire-Atlantique (2008-2012)      | 628633  | 666055  | 1294688 |
| Manche (2008-2011)                | 243410  | 256207  | 499617  |
| Somme (2008-2012)                 | 277891  | 294583  | 572473  |
| Tarn (2008-2012)                  | 183786  | 196718  | 380504  |
| Territoire de Belfort (2008-2012) | 71726   | 71745   | 143471  |
| Vendée (2008-2012)                | 312729  | 325004  | 637734  |
| Martinique                        | 181924  | 211844  | 393768  |
| French Guiana (2008-2012)         | 113732  | 115982  | 229715  |
| <b>Italy</b>                      |         |         |         |
| Ferrara (2008-2011)               | 171696  | 187460  | 359156  |
| Friuli-Venezia-Giulia (2008-2010) | 599559  | 637071  | 1236630 |
| Modena (2008-2012)                | 330353  | 348295  | 678648  |
| Parma (2008-2012)                 | 205418  | 220110  | 425527  |
| Piacenza (2008-2011)              | 139502  | 147038  | 286540  |
| Reggio Emilia (2008-2012)         | 260367  | 268642  | 529010  |
| Romagna (2008-2012)               | 597601  | 630355  | 1227956 |
| Sud Tirolo (2008-2010)            | 248087  | 254495  | 502582  |
| Trento (2008-2010)                | 251034  | 263077  | 514111  |
| Veneto (2008-2010)                | 1244623 | 1319312 | 2563935 |
| Val d'Aosta (2008-2012)           | 62350   | 64802   | 127152  |
| Bergamo (2008-2012)               | 536216  | 545388  | 1081604 |
| Biella (2008-2012)                | 88224   | 96391   | 184615  |
| Como (2008-2011)                  | 285608  | 298756  | 584364  |
| Cremona (2008-2010)               | 177218  | 184746  | 361963  |
| Lecco (2008-2010)                 | 163912  | 169941  | 333853  |
| Lombardy, South Pavia (2008-2010) | 264804  | 280480  | 545284  |

|                                     |                |                |                 |
|-------------------------------------|----------------|----------------|-----------------|
| Mantua (2008-2010)                  | 196124         | 206611         | 402735          |
| Milan (2008-2012)                   | 1319796        | 1432957        | 2752753         |
| Monza (2008-2012)                   | 410086         | 427279         | 837365          |
| Sondrio (2008-2012)                 | 89076          | 92937          | 182013          |
| Turin (2008-2012)                   | 1080631        | 1163274        | 2243905         |
| Varese (2008-2012)                  | 418953         | 444620         | 863573          |
| Florence & Prato (2008-2010)        | 577579         | 626388         | 1203967         |
| Latina (2008-2012)                  | 269284         | 280537         | 549821          |
| Umbria (2008-2011)                  | 421366         | 455031         | 876398          |
| Barletta (2008-2011)                | 192619         | 197568         | 390187          |
| Caserta (2008-2010)                 | 440252         | 463756         | 904008          |
| Naples (2008-2012)                  | 276019         | 289231         | 565251          |
| Taranto (2008-2011)                 | 283597         | 301289         | 584886          |
| Catania, Messina & Enna (2008-2012) | 920365         | 990501         | 1910866         |
| Nuoro (2008-2012)                   | 107013         | 110718         | 217731          |
| Palermo (2008-2012)                 | 599461         | 645848         | 1245310         |
| Ragusa & Caltanissetta (2008-2012)  | 282736         | 298948         | 581684          |
| Sassari (2008-2011)                 | 239950         | 249266         | 489216          |
| Syracuse (2008-2012)                | 195913         | 203660         | 399573          |
| <b>Peru, Lima</b>                   | <b>4536512</b> | <b>4768407</b> | <b>9304919</b>  |
| <b>Portugal, Azores</b>             | <b>121690</b>  | <b>125191</b>  | <b>24688</b>    |
| <b>Spain</b>                        | <b>6179374</b> | <b>6252041</b> | <b>12431416</b> |
| Asturias (2008-2010)                | 505659         | 552129         | 1057788         |
| Basque Country (2008-2012)          | 1058904        | 1110937        | 2169841         |
| Castellón (2008-2012)               | 302512         | 299567         | 602080          |
| Girona (2008-2012)                  | 375771         | 366750         | 742521          |
| La Rioja (2008-2012)                | 160369         | 159379         | 319747          |
| Mallorca (2008-2011)                | 430766         | 428350         | 859116          |
| Navarra (2008-2010)                 | 314730         | 314563         | 629293          |
| Tarragona (2008-2012)               | 404773         | 394496         | 799269          |
| Albacete (2008-2010)                | 199863         | 198437         | 398300          |
| Canary Isles (2008-2011)            | 866740         | 878524         | 1745265         |
| Ciudad Real (2008-2011)             | 261574         | 262955         | 524528          |
| Cuenca (2008-2011)                  | 109505         | 106444         | 215949          |
| Granada (2008-2012)                 | 454037         | 461496         | 915532          |

|                       |                |                |                |
|-----------------------|----------------|----------------|----------------|
| Murcia (2008-2010)    | 734171         | 718016         | 1452187        |
| <b>Switzerland</b>    | <b>1100768</b> | <b>1156227</b> | <b>2256995</b> |
| Fribourg (2008-2012)  | 137559         | 138867         | 276426         |
| Geneva (2008-2012)    | 218482         | 235165         | 453647         |
| Neuchâtel (2008-2012) | 83566          | 88409          | 171974         |
| Ticino (2008-2012)    | 162546         | 173615         | 336161         |
| Valais (2008-2012)    | 154422         | 157992         | 312414         |
| Vaud (2008-2012)      | 344193         | 362179         | 706372         |
| <b>Uruguay</b>        | <b>1640405</b> | <b>1754983</b> | <b>3395387</b> |
| <b>Puerto Rico</b>    | <b>1823075</b> | <b>1981028</b> | <b>3804103</b> |

**Table S2.** Overall, highest and lowest incidence (ASRw) in males, with r/R, for each geographic entity

| Geographic entity *                | ASRw          |               |               | r/R (%)      |
|------------------------------------|---------------|---------------|---------------|--------------|
|                                    | Overall       | Highest       | Lowest        |              |
| <b>Argentina</b>                   | <b>215.22</b> | <b>237.96</b> | <b>173.24</b> | <b>30.07</b> |
| <i>North</i>                       | 189.68        | N/A           | N/A           | N/A          |
| Chaco (2008-2012)                  | 189.68        | N/A           | N/A           | N/A          |
| <i>Central</i>                     | 222.12        | 237.96        | 213.80        | 10.88        |
| Córdoba (2008-2012)                | 223.13        | N/A           | N/A           | N/A          |
| Entre Rios Province (2008-2011)    | 237.96        | N/A           | N/A           | N/A          |
| Mendoza (2008-2012)                | 213.8         | N/A           | N/A           | N/A          |
| <i>South</i>                       | 173.24        | N/A           | N/A           | N/A          |
| Tierra del Fuego (2008-2012)       | 173.24        | N/A           | N/A           | N/A          |
| <b>Belgium</b>                     | <b>364.28</b> | N/A           | N/A           | N/A          |
| <b>Brazil</b>                      | <b>272.58</b> | <b>380.33</b> | <b>230.10</b> | <b>55.11</b> |
| <i>North-east</i>                  | 281.88        | N/A           | N/A           | N/A          |
| Aracaju (2008-2012)                | 281.88        | N/A           | N/A           | N/A          |
| <i>Central</i>                     | 301.67        | N/A           | N/A           | N/A          |
| Goiânia (2008-2012)                | 301.67        | N/A           | N/A           | N/A          |
| <i>South</i>                       | 254.16        | 380.33        | 2301.0        | 39.50        |
| <i>South without Florianopolis</i> | 235.58        | 261.48        | 230.10        | 13.30        |
| Curitiba (2008-2011)               | 230.10        | N/A           | N/A           | N/A          |
| Jau (2008-2012)                    | 261.48        | N/A           | N/A           | N/A          |
| Pocos de Caldas (2008-2011)        | 259.19        | N/A           | N/A           | N/A          |

|                                   |               |               |               |              |
|-----------------------------------|---------------|---------------|---------------|--------------|
| Florianopolis (2008-2010) **      | 380.33        | N/A           | N/A           | N/A          |
| <b>Chile</b>                      | <b>209.75</b> | <b>221.59</b> | <b>208.14</b> | <b>6.41</b>  |
| Bío Bío Province (2008-2012)      | 209.27        | N/A           | N/A           | N/A          |
| Concepcion (2008-2010)            | 208.14        | N/A           | N/A           | N/A          |
| Region of Antofagasta (2008-2010) | 221.59        | N/A           | N/A           | N/A          |
| Valdivia (2008-2012)              | 208.49        | N/A           | N/A           | N/A          |
| <b>Colombia</b>                   | <b>179.15</b> | <b>204.49</b> | <b>133.54</b> | <b>39.60</b> |
| Cali (2008-2012) **               | 204.49        | N/A           | N/A           | N/A          |
| <i>Rest of Columbia</i>           | <i>149.97</i> | <i>155.94</i> | <i>133.54</i> | <i>14.94</i> |
| Bucaramanga (2008-2012)           | 153.51        | N/A           | N/A           | N/A          |
| Manizales (2008-2012)             | 155.94        | N/A           | N/A           | N/A          |
| Pasto (2008-2012)                 | 133.54        | N/A           | N/A           | N/A          |
| <b>Costa Rica</b>                 | <b>173.9</b>  | N/A           | N/A           | N/A          |
| <b>Ecuador</b>                    | <b>135.11</b> | <b>192.79</b> | <b>89.45</b>  | <b>76.49</b> |
| <i>North-Central</i>              | <i>192.79</i> | N/A           | N/A           | N/A          |
| Quito (2008-2012)                 | 192.79        | N/A           | N/A           | N/A          |
| <i>Central</i>                    | <i>125.43</i> | <i>152.68</i> | <i>120.06</i> | <i>26.01</i> |
| Cuenca (2008-2012)                | 152.68        | N/A           | N/A           | N/A          |
| Guayaquil (2008-2012)             | 120.06        | N/A           | N/A           | N/A          |
| <i>South</i>                      | <i>168.50</i> | N/A           | N/A           | N/A          |
| Loja (2008-2010)                  | 168.50        | N/A           | N/A           | N/A          |
| <i>Pacific</i>                    |               |               |               |              |
| Manabi (2008-2012)                | 89.45         | N/A           | N/A           | N/A          |
| <b>France</b>                     | <b>369.35</b> | <b>432.04</b> | <b>303.96</b> | <b>34.68</b> |
| <i>Metropolitan</i>               | <i>372.25</i> | <i>432.04</i> | <i>334.45</i> | <i>26.20</i> |
| Bas-Rhin (2008-2011)              | 370.2         | N/A           | N/A           | N/A          |
| Calvados (2008-2012)              | 376.97        | N/A           | N/A           | N/A          |
| Doubs (2008-2012)                 | 388.8         | N/A           | N/A           | N/A          |
| Gironde (2008-2012)               | 365.38        | N/A           | N/A           | N/A          |
| Haut-Rhin (2008-2012)             | 366.53        | N/A           | N/A           | N/A          |
| Hérault (2008-2012)               | 357.34        | N/A           | N/A           | N/A          |
| Isère (2008-2012)                 | 362.66        | N/A           | N/A           | N/A          |
| Lille-Métropole (2008-2012)       | 432.04        | N/A           | N/A           | N/A          |
| Limousin (2009-2012)              | 364.54        | N/A           | N/A           | N/A          |
| Loire-Atlantique (2008-2012)      | 396.93        | N/A           | N/A           | N/A          |

|                                   |               |               |               |              |
|-----------------------------------|---------------|---------------|---------------|--------------|
| Manche (2008-2011)                | 355.74        | N/A           | N/A           | N/A          |
| Somme (2008-2012)                 | 368.77        | N/A           | N/A           | N/A          |
| Tarn (2008-2012)                  | 334.45        | N/A           | N/A           | N/A          |
| Territoire de Belfort (2008-2012) | 385.81        | N/A           | N/A           | N/A          |
| Vendée (2008-2012)                | 365.04        | N/A           | N/A           | N/A          |
| <i>Overseas</i>                   | <i>304.79</i> | <i>312.08</i> | <i>303.96</i> | <i>2.66</i>  |
| Martinique                        | 303.96        | N/A           | N/A           | N/A          |
| French Guiana (2008-2012)         | 312.08        | N/A           | N/A           | N/A          |
| <b>Italy</b>                      | <b>331.81</b> | <b>388.53</b> | <b>271.96</b> | <b>35.13</b> |
| <i>North-east</i>                 | <i>346.53</i> | <i>372.44</i> | <i>297.06</i> | <i>21.75</i> |
| Ferrara (2008-2011)               | 372.44        | N/A           | N/A           | N/A          |
| Friuli-Venezia-Giulia (2008-2010) | 354.6         | N/A           | N/A           | N/A          |
| Modena (2008-2012)                | 347.81        | N/A           | N/A           | N/A          |
| Parma (2008-2012)                 | 348.95        | N/A           | N/A           | N/A          |
| Piacenza (2008-2011)              | 339.77        | N/A           | N/A           | N/A          |
| Reggio Emilia (2008-2012)         | 319.51        | N/A           | N/A           | N/A          |
| Romagna (2008-2012)               | 358.38        | N/A           | N/A           | N/A          |
| Sud Tirolo (2008-2010)            | 333.54        | N/A           | N/A           | N/A          |
| Trento (2008-2010)                | 297.06        | N/A           | N/A           | N/A          |
| Veneto (2008-2010)                | 346.76        | N/A           | N/A           | N/A          |
| <i>North-west</i>                 | <i>343.67</i> | <i>388.53</i> | <i>330.74</i> | <i>16.82</i> |
| Val d'Aosta (2008-2012)           | 343.87        | N/A           | N/A           | N/A          |
| Bergamo (2008-2012)               | 365.48        | N/A           | N/A           | N/A          |
| Biella (2008-2012)                | 388.53        | N/A           | N/A           | N/A          |
| Como (2008-2011)                  | 336.12        | N/A           | N/A           | N/A          |
| Cremona (2008-2010)               | 349.03        | N/A           | N/A           | N/A          |
| Lecco (2008-2010)                 | 348.18        | N/A           | N/A           | N/A          |
| Lombardy, South Pavia (2008-2010) | 353.85        | N/A           | N/A           | N/A          |
| Mantua (2008-2010)                | 346.11        | N/A           | N/A           | N/A          |
| Milan (2008-2012)                 | 346.53        | N/A           | N/A           | N/A          |
| Monza (2008-2012)                 | 330.74        | N/A           | N/A           | N/A          |
| Sondrio (2008-2012)               | 379.92        | N/A           | N/A           | N/A          |
| Turin (2008-2012)                 | 331.2         | N/A           | N/A           | N/A          |
| Varese (2008-2012)                | 336.17        | N/A           | N/A           | N/A          |
| <i>Central</i>                    | <i>324.55</i> | <i>337.07</i> | <i>300.37</i> | <i>11.31</i> |

|                                     |               |               |               |              |
|-------------------------------------|---------------|---------------|---------------|--------------|
| Florence & Prato (2008-2010)        | 337.07        | N/A           | N/A           | N/A          |
| Latina (2008-2012)                  | 300.37        | N/A           | N/A           | N/A          |
| Umbria (2008-2011)                  | 328.67        | N/A           | N/A           | N/A          |
| <i>South</i>                        | <i>317.03</i> | <i>339.23</i> | <i>295.26</i> | <i>13.87</i> |
| Barletta (2008-2011)                | 295.26        | N/A           | N/A           | N/A          |
| Caserta (2008-2010)                 | 324.86        | N/A           | N/A           | N/A          |
| Naples (2008-2012)                  | 339.23        | N/A           | N/A           | N/A          |
| Taranto (2008-2011)                 | 300.8         | N/A           | N/A           | N/A          |
| <i>Islands</i>                      | <i>292.27</i> | <i>311.26</i> | <i>271.96</i> | <i>13.45</i> |
| Catania, Messina & Enna (2008-2012) | 295.29        | N/A           | N/A           | N/A          |
| Nuoro (2008-2012)                   | 311.26        | N/A           | N/A           | N/A          |
| Palermo (2008-2012)                 | 298.24        | N/A           | N/A           | N/A          |
| Ragusa & Caltanissetta (2008-2012)  | 271.96        | N/A           | N/A           | N/A          |
| Sassari (2008-2011)                 | 298.1         | N/A           | N/A           | N/A          |
| Syracuse (2008-2012)                | 272.49        | N/A           | N/A           | N/A          |
| <b>Peru, Lima</b>                   | <b>187.04</b> | N/A           | N/A           | N/A          |
| <b>Portugal, Azores</b>             | <b>381.92</b> | N/A           | N/A           | N/A          |
| <b>Spain</b>                        | <b>339.97</b> | <b>382.91</b> | <b>279.90</b> | <b>30.30</b> |
| <i>North-East</i>                   | <i>357.91</i> | <i>382.91</i> | <i>317.21</i> | <i>18.36</i> |
| Asturias (2008-2010)                | 361.27        | N/A           | N/A           | N/A          |
| Basque Country (2008-2012)          | 382.91        | N/A           | N/A           | N/A          |
| Castellón (2008-2012)               | 317.21        | N/A           | N/A           | N/A          |
| Girona (2008-2012)                  | 335.79        | N/A           | N/A           | N/A          |
| La Rioja (2008-2012)                | 337.72        | N/A           | N/A           | N/A          |
| Mallorca (2008-2011)                | 347.92        | N/A           | N/A           | N/A          |
| Navarra (2008-2010)                 | 360.94        | N/A           | N/A           | N/A          |
| Tarragona (2008-2012)               | 346.39        | N/A           | N/A           | N/A          |
| <i>South</i>                        | <i>308.34</i> | <i>337.66</i> | <i>279.9</i>  | <i>18.73</i> |
| Albacete (2008-2010)                | 285.48        | N/A           | N/A           | N/A          |
| Canary Isles (2008-2011)            | 306.09        | N/A           | N/A           | N/A          |
| Ciudad Real (2008-2011)             | 296.01        | N/A           | N/A           | N/A          |
| Cuenca (2008-2011)                  | 279.9         | N/A           | N/A           | N/A          |
| Granada (2008-2012)                 | 303.66        | N/A           | N/A           | N/A          |
| Murcia (2008-2010)                  | 337.66        | N/A           | N/A           | <i>Na</i>    |
| <b>Switzerland</b>                  | <b>338.22</b> | <b>350.38</b> | <b>310.39</b> | <b>11.82</b> |

|                       |               |               |               |           |
|-----------------------|---------------|---------------|---------------|-----------|
| Fribourg (2008-2012)  | 346.51        | N/A           | N/A           | <i>Na</i> |
| Geneva (2008-2012)    | 344.76        | N/A           | N/A           | N/A       |
| Neuchâtel (2008-2012) | 328.28        | N/A           | N/A           | N/A       |
| Ticino (2008-2012)    | 310.39        | N/A           | N/A           | N/A       |
| Valais (2008-2012)    | 350.38        | N/A           | N/A           | N/A       |
| Vaud (2008-2012)      | 343.32        | N/A           | N/A           | N/A       |
| <b>Uruguay</b>        | <b>289.56</b> | <b>286.34</b> | <b>292.82</b> | N/A       |
| <b>Puerto Rico</b>    | <b>258.28</b> | N/A           | N/A           | N/A       |

\*Countries in bold, regions in italics, cancer registries in normal font. Regions may be a group of geographically related cancer registries or a single registry (if responsible for wide within region incidence variation).

\*\* Registry responsible for  $r/R \geq 30$  in country/region

N/A: geographic entity not split into sub-entities because  $r/R < 30$ .



**Table S3.** Overall, highest and lowest incidence (ASRw) in females with r/R, for each geographic entity

| Geographic entity                  | ASRw          |               |               | r/R(%)       |
|------------------------------------|---------------|---------------|---------------|--------------|
|                                    | Overall       | Highest       | Lowest        |              |
| <b>Argentina</b>                   | <b>201.16</b> | <b>213.54</b> | <b>149.16</b> | <b>32.00</b> |
| <i>North</i>                       | <i>174.77</i> | N/A           | N/A           | N/A          |
| Chaco (2008-2012)                  | 174.77        | N/A           | N/A           | N/A          |
| <i>Central</i>                     | <i>207.66</i> | <i>213.54</i> | <i>197.74</i> | <i>7.61</i>  |
| Córdoba (2008-2012)                | 213.54        | N/A           | N/A           | N/A          |
| Entre Rios Province (2008-2011)    | 197.74        | N/A           | N/A           | N/A          |
| Mendoza (2008-2012)                | 207.93        | N/A           | N/A           | N/A          |
| <i>South</i>                       | <i>149.16</i> | N/A           | N/A           | N/A          |
| Tierra del Fuego (2008-2012)       | 149.16        | N/A           | N/A           | N/A          |
| <b>Belgium</b>                     | <b>289.21</b> | N/A           | N/A           | N/A          |
| <b>Brazil</b>                      | <b>199.34</b> | <b>338.43</b> | <b>172.68</b> | <b>83.15</b> |
| <i>North-east</i>                  | <i>208.57</i> | <i>208.57</i> | <i>174.76</i> | <i>16.80</i> |
| Aracaju (2008-2012)                | 208.57        | N/A           | N/A           | N/A          |
| <i>Central</i>                     | <i>194.18</i> | N/A           | N/A           | N/A          |
| Goiânia (2008-2012)                | 194.18        | N/A           | N/A           | N/A          |
| <i>South</i>                       | <i>200.10</i> | 338.43        | 172.68        | 82.83        |
| <i>South without Florianopolis</i> | <i>179.99</i> | <i>181.19</i> | <i>172.68</i> | <i>4.72</i>  |
| Curitiba (2008-2011)               | 181.19        | N/A           | N/A           | N/A          |
| Jau (2008-2012)                    | 174.76        | N/A           | N/A           | N/A          |
| Pocos de Caldas (2008-2011)        | 172.68        | N/A           | N/A           | N/A          |
| Florianopolis (2008-2010) **       | 338.43        | N/A           | N/A           | N/A          |
| <b>Chile</b>                       | <b>174.99</b> | <b>178.59</b> | <b>168.36</b> | <b>5.85</b>  |
| Bío Bío Province (2008-2012)       | 177.92        | N/A           | N/A           | N/A          |
| Concepcion (2008-2010)             | 178.59        | N/A           | N/A           | N/A          |
| Region of Antofagasta (2008-2010)  | 173.73        | N/A           | N/A           | N/A          |
| Valdivia (2008-2012)               | 168.36        | N/A           | N/A           | N/A          |
| <b>Colombia</b>                    | <b>171.71</b> | <b>164.84</b> | <b>144.36</b> | <b>11.93</b> |
| Cali (2008-2012)                   | 185.4         | N/A           | N/A           | N/A          |
| Bucaramanga (2008-2012)            | 156.19        | N/A           | N/A           | N/A          |
| Manizales (2008-2012)              | 164.84        | N/A           | N/A           | N/A          |
| Pasto (2008-2012)                  | 144.36        | N/A           | N/A           | N/A          |
| <b>Costa Rica</b>                  | <b>167.25</b> | N/A           | N/A           | N/A          |

|                                   |               |               |               |              |
|-----------------------------------|---------------|---------------|---------------|--------------|
| <b>Ecuador</b>                    | <b>152.43</b> | <b>206.51</b> | <b>102.32</b> | <b>68.35</b> |
| <i>North-Central</i>              | <i>199.11</i> | N/A           | N/A           | N/A          |
| Quito (2008-2012)                 | 199.11        | N/A           | N/A           | N/A          |
| <i>Central</i>                    | <i>144.88</i> | <i>149.44</i> | <i>144.02</i> | <i>3.93</i>  |
| Cuenca (2008-2012)                | 149.44        | N/A           | N/A           | N/A          |
| Guayaquil (2008-2012)             | 144.02        | N/A           | N/A           | N/A          |
| <i>South</i>                      | <i>206.51</i> | N/A           | N/A           | N/A          |
| Loja (2008-2010)                  | 206.51        | N/A           | N/A           | N/A          |
| <i>Pacific</i>                    |               |               |               |              |
| Manabi (2008-2012)                | 102.32        | N/A           | N/A           | N/A          |
| <b>France</b>                     | <b>258.36</b> | <b>290.55</b> | <b>174.68</b> | <b>44.85</b> |
| <i>Metropolitan</i>               | <i>262.2</i>  | <i>290.55</i> | <i>241.51</i> | <i>18.70</i> |
| Bas-Rhin (2008-2011)              | 259.58        | N/A           | N/A           | N/A          |
| Calvados(2008-2012)               | 262.18        | N/A           | N/A           | N/A          |
| Doubs (2008-2012)                 | 249.02        | N/A           | N/A           | N/A          |
| Gironde (2008-2012)               | 271.17        | N/A           | N/A           | N/A          |
| Haut-Rhin (2008-2012)             | 253.26        | N/A           | N/A           | N/A          |
| Hérault (2008-2012)               | 260.05        | N/A           | N/A           | N/A          |
| Isère (2008-2012)                 | 272.5         | N/A           | N/A           | N/A          |
| Lille-Métropole (2008-2012)       | 290.55        | N/A           | N/A           | N/A          |
| Limousin (2009-2012)              | 245.16        | N/A           | N/A           | N/A          |
| Loire-Atlantique (2008-2012)      | 263.22        | N/A           | N/A           | N/A          |
| Manche (2008-2011)                | 241.51        | N/A           | N/A           | N/A          |
| Somme (2008-2012)                 | 258.65        | N/A           | N/A           | N/A          |
| Tarn (2008-2012)                  | 247.29        | N/A           | N/A           | N/A          |
| Territoire de Belfort (2008-2012) | 250.12        | N/A           | N/A           | N/A          |
| Vendée (2008-2012)                | 261.8         | N/A           | N/A           | N/A          |
| <i>Overseas</i>                   | <i>181.03</i> | <i>210.31</i> | <i>174.68</i> | <i>19.68</i> |
| Martinique (2008-2012)            | 174.68        | N/A           | N/A           | N/A          |
| French Guiana (2008-2012)         | 210.31        | N/A           | N/A           | N/A          |
| <b>Italy</b>                      | <b>264.22</b> | <b>308.74</b> | <b>221.44</b> | <b>33.04</b> |
| <i>North-east</i>                 | <i>281.59</i> | <i>308.74</i> | <i>238.48</i> | <i>25.33</i> |
| Ferrara (2008-2011)               | 297.89        | N/A           | N/A           | N/A          |
| Friuli Venezia Giulia (2008-2010) | 270.77        | N/A           | N/A           | N/A          |
| Modena (2008-2012)                | 297.96        | N/A           | N/A           | N/A          |

|                                     |               |               |               |              |
|-------------------------------------|---------------|---------------|---------------|--------------|
| Parma (2008-2012)                   | 308.74        | N/A           | N/A           | N/A          |
| Piacenza (2008-2011)                | 279.43        | N/A           | N/A           | N/A          |
| Reggio Emilia (2008-2012)           | 275.9         | N/A           | N/A           | N/A          |
| Romagna (2008-2012)                 | 304.43        | N/A           | N/A           | N/A          |
| Sud Tirolo (2008-2010)              | 239.8         | N/A           | N/A           | N/A          |
| Trento (2008-2010)                  | 238.48        | N/A           | N/A           | N/A          |
| Veneto (2008-2010)                  | 268.13        | N/A           | N/A           | N/A          |
| <i>North-west</i>                   | <i>267.75</i> | <i>285.41</i> | <i>250.42</i> | <i>13.05</i> |
| Val d'Aosta (2008-2012)             | 250.42        | N/A           | N/A           | N/A          |
| Bergamo (2008-2012)                 | 274.65        | N/A           | N/A           | N/A          |
| Biella (2008-2012)                  | 285.41        | N/A           | N/A           | N/A          |
| Como (2008-2011)                    | 266.94        | N/A           | N/A           | N/A          |
| Cremona (2008-2010)                 | 270.61        | N/A           | N/A           | N/A          |
| Lecco (2008-2010)                   | 278.7         | N/A           | N/A           | N/A          |
| Lombardy, South, Pavia (2008-2010)  | 262.47        | N/A           | N/A           | N/A          |
| Mantua (2008-2010)                  | 285.36        | N/A           | N/A           | N/A          |
| Milan (2008-2012)                   | 278.4         | N/A           | N/A           | N/A          |
| Monza (2008-2012)                   | 264.69        | N/A           | N/A           | N/A          |
| Sondrio (2008-2012)                 | 263.01        | N/A           | N/A           | N/A          |
| Turin (2008-2012)                   | 254.76        | N/A           | N/A           | N/A          |
| Varese (2008-2012)                  | 256.43        | N/A           | N/A           | N/A          |
| <i>Central</i>                      | <i>268.03</i> | <i>278.46</i> | <i>250.18</i> | <i>10.64</i> |
| Florence & Prato (2008-2010)        | 278.46        | N/A           | N/A           | N/A          |
| Latina (2008-2012)                  | 250.18        | N/A           | N/A           | N/A          |
| Umbria (2008-2011)                  | 269.74        | N/A           | N/A           | N/A          |
| <i>South</i>                        | <i>240.80</i> | <i>248.79</i> | <i>233.13</i> | <i>6.50</i>  |
| Barletta (2008-2011)                | 240.82        | N/A           | N/A           | N/A          |
| Caserta (2008-2010)                 | 233.13        | N/A           | N/A           | N/A          |
| Naples (2008-2012)                  | 241.35        | N/A           | N/A           | N/A          |
| Taranto (2008-2011)                 | 248.79        | N/A           | N/A           | N/A          |
| <i>Islands</i>                      | <i>237.76</i> | <i>247.23</i> | <i>221.44</i> | <i>10.94</i> |
| Catania, Messina & Enna (2008-2012) | 247.1         | N/A           | N/A           | N/A          |
| Nuoro (2008-2012)                   | 247.23        | N/A           | N/A           | N/A          |
| Palermo (2008-2012)                 | 231.35        | N/A           | N/A           | N/A          |
| Ragusa & Caltanissetta (2008-2012)  | 221.44        | N/A           | N/A           | N/A          |

|                            |               |               |               |              |
|----------------------------|---------------|---------------|---------------|--------------|
| Sassari (2008-2011)        | 246.68        | N/A           | N/A           | N/A          |
| Syracuse (2008-2012)       | 221.66        | N/A           | N/A           | N/A          |
| <b>Peru, Lima</b>          | <b>187.51</b> | N/A           | N/A           | N/A          |
| <b>Portugal, Azores</b>    | <b>209.67</b> | N/A           | N/A           | N/A          |
| <b>Spain</b>               | <b>210.56</b> | <b>230.08</b> | <b>178.33</b> | <b>24.58</b> |
| <i>North-East</i>          | <i>216.12</i> | <i>225.98</i> | <i>182.05</i> | <i>19.44</i> |
| Asturias (2008-2010)       | 210.62        | N/A           | N/A           | N/A          |
| Basque Country (2008-2012) | 230.08        | N/A           | N/A           | N/A          |
| Castellón (2008-2012)      | 186.35        | N/A           | N/A           | N/A          |
| Girona (2008-2012)         | 208.84        | N/A           | N/A           | N/A          |
| La Rioja (2008-2012)       | 199.38        | N/A           | N/A           | N/A          |
| Mallorca (2008-2011)       | 202.42        | N/A           | N/A           | N/A          |
| Navarra (2008-2010)        | 229.29        | N/A           | N/A           | N/A          |
| Tarragona (2008-2012)      | 220.01        | N/A           | N/A           | N/A          |
| <i>South</i>               | <i>200.68</i> | <i>230.08</i> | <i>178.33</i> | <i>25.54</i> |
| Albacete (2008-2010)       | 182.05        | N/A           | N/A           | N/A          |
| Canary Isles (2008-2011)   | 199.72        | N/A           | N/A           | N/A          |
| Ciudad Real (2008-2011)    | 197.91        | N/A           | N/A           | N/A          |
| Cuenca (2008-2011)         | 178.33        | N/A           | N/A           | N/A          |
| Granada (2008-2012)        | 201.59        | N/A           | N/A           | N/A          |
| Murcia (2008-2010)         | 214.03        | N/A           | N/A           | N/A          |
| <b>Switzerland</b>         | <b>261.41</b> | <b>270.26</b> | <b>255.11</b> | <b>5.80</b>  |
| Fribourg (2008-2012)       | 258.44        | N/A           | N/A           | N/A          |
| Geneva (2008-2012)         | 270.26        | N/A           | N/A           | N/A          |
| Neuchâtel (2008-2012)      | 256.49        | N/A           | N/A           | N/A          |
| Ticino (2008-2012)         | 262.59        | N/A           | N/A           | N/A          |
| Valais (2008-2012)         | 255.11        | N/A           | N/A           | N/A          |
| Vaud (2008-2012)           | 260.17        | N/A           | N/A           | N/A          |
| <b>Uruguay</b>             | <b>216.77</b> | N/A           | N/A           | N/A          |
| <b>Puerto Rico</b>         | <b>197.95</b> | N/A           | N/A           | N/A          |

\*Countries in bold, regions in italics, cancer registries in normal font. Regions may be a group of geographically related cancer registries or a single registry (if responsible for wide within region incidence variation).

\*\* Registry responsible for  $r/R \geq 30$  in country/region

N/A: geographic entity not split into sub-entities because  $r/R < 30$ .
